# Supplementary material for: The eIF2α kinase HRI triggers the autophagic clearance of cytosolic protein aggregates
Source: PubMed Central journal article supplement (PMC7948985; doi:10.1074/jbc.ra120.014415), 2020-12-02
Supplement: mmc1.pdf [file mmc1.pdf]

**1C**

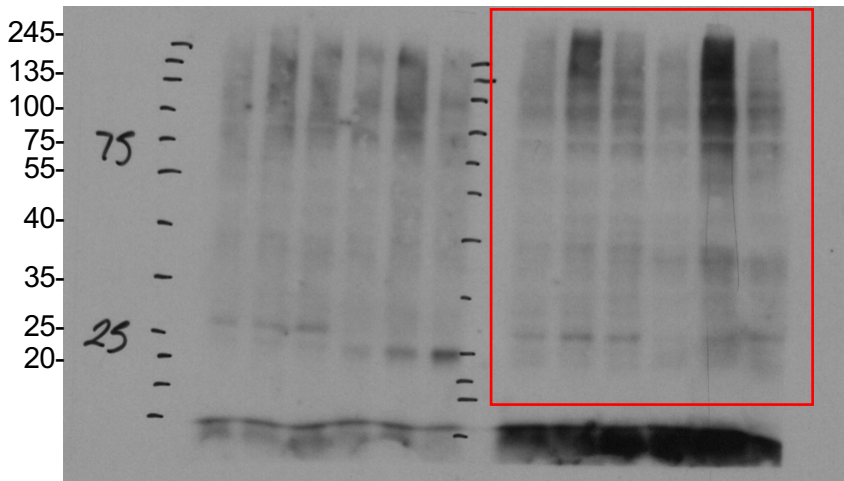

|              |       |   |   |       |   |   |
|--------------|-------|---|---|-------|---|---|
| MG132:       | -     | + | - | -     | + | - |
| Bafilomycin: | -     | - | + | -     | - | + |
|              | <hr/> |   |   | <hr/> |   |   |
|              | SC    |   |   | shHRI |   |   |

**Source Data Figure 1**

**2A**

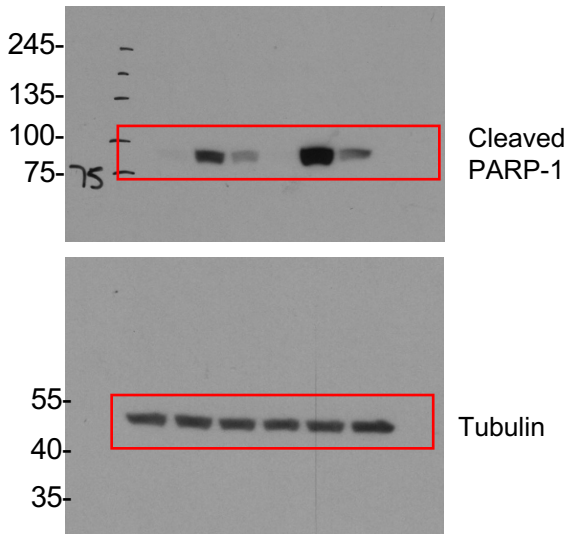

|              |       |   |   |       |   |   |
|--------------|-------|---|---|-------|---|---|
| MG132:       | -     | + | - | -     | + | - |
| Bafilomycin: | -     | - | + | -     | - | + |
|              | <hr/> |   |   | <hr/> |   |   |
|              | SC    |   |   | shHRI |   |   |

**2B**

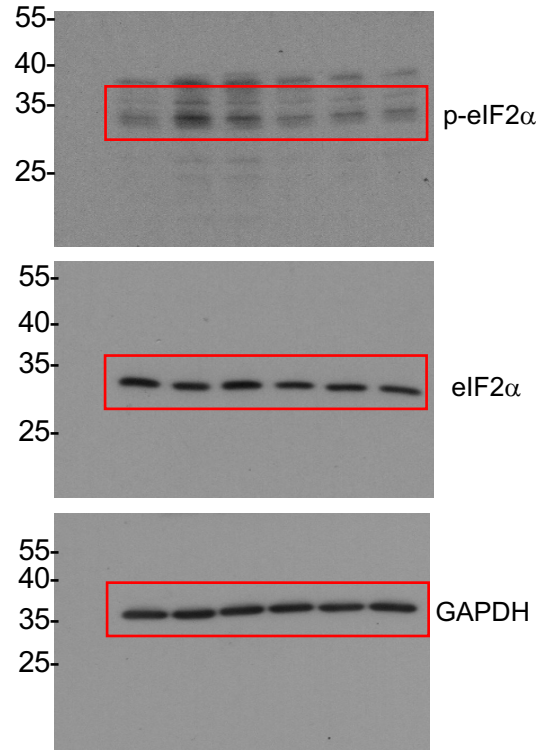

|              |       |   |   |       |   |   |
|--------------|-------|---|---|-------|---|---|
| MG132:       | -     | + | - | -     | + | - |
| Bafilomycin: | -     | - | + | -     | - | + |
|              | <hr/> |   |   | <hr/> |   |   |
|              | SC    |   |   | shHRI |   |   |

**Source Data Figure 2**

2C

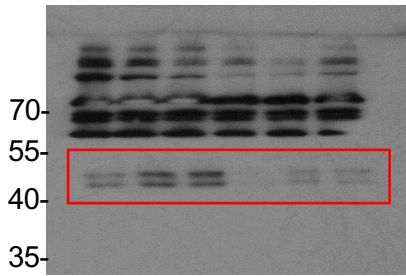

ATF4

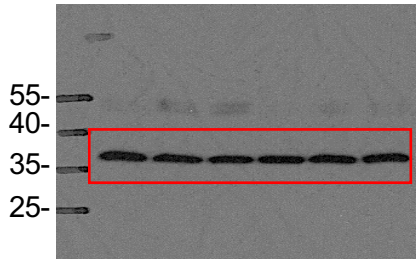

GAPDH

|              |    |   |   |       |   |   |
|--------------|----|---|---|-------|---|---|
| MG132:       | -  | + | - | -     | + | - |
| Bafilomycin: | -  | - | + | -     | - | + |
|              | SC |   |   | shHRI |   |   |

2D

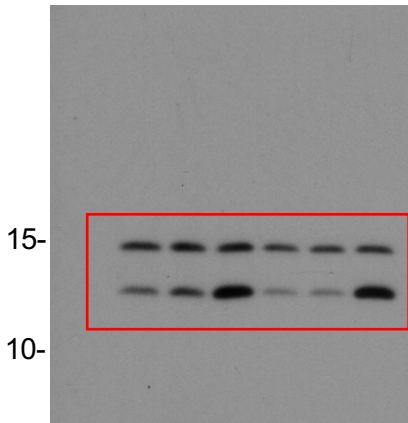

LC3 A/B-I

LC3 A/B-II

|              |    |   |   |       |   |   |
|--------------|----|---|---|-------|---|---|
| MG132:       | -  | + | - | -     | + | - |
| Bafilomycin: | -  | - | + | -     | - | + |
|              | SC |   |   | shHRI |   |   |

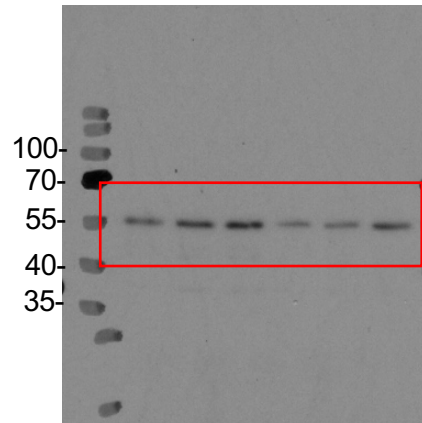

p62

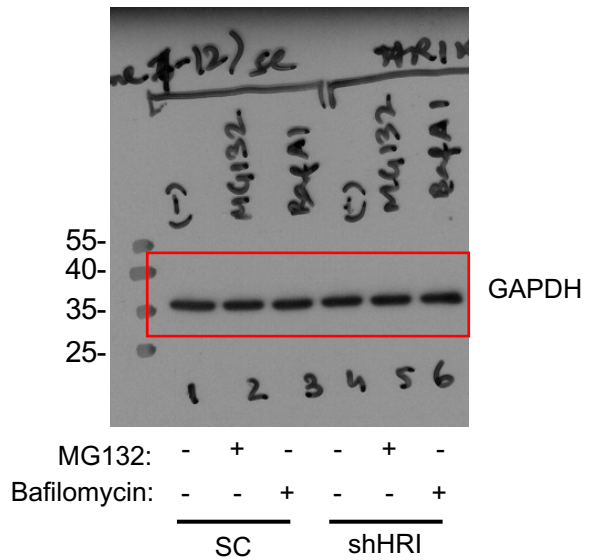

GAPDH

|              |    |   |   |       |   |   |
|--------------|----|---|---|-------|---|---|
| MG132:       | -  | + | - | -     | + | - |
| Bafilomycin: | -  | - | + | -     | - | + |
|              | SC |   |   | shHRI |   |   |

Source Data Figure 2 contd.

3A

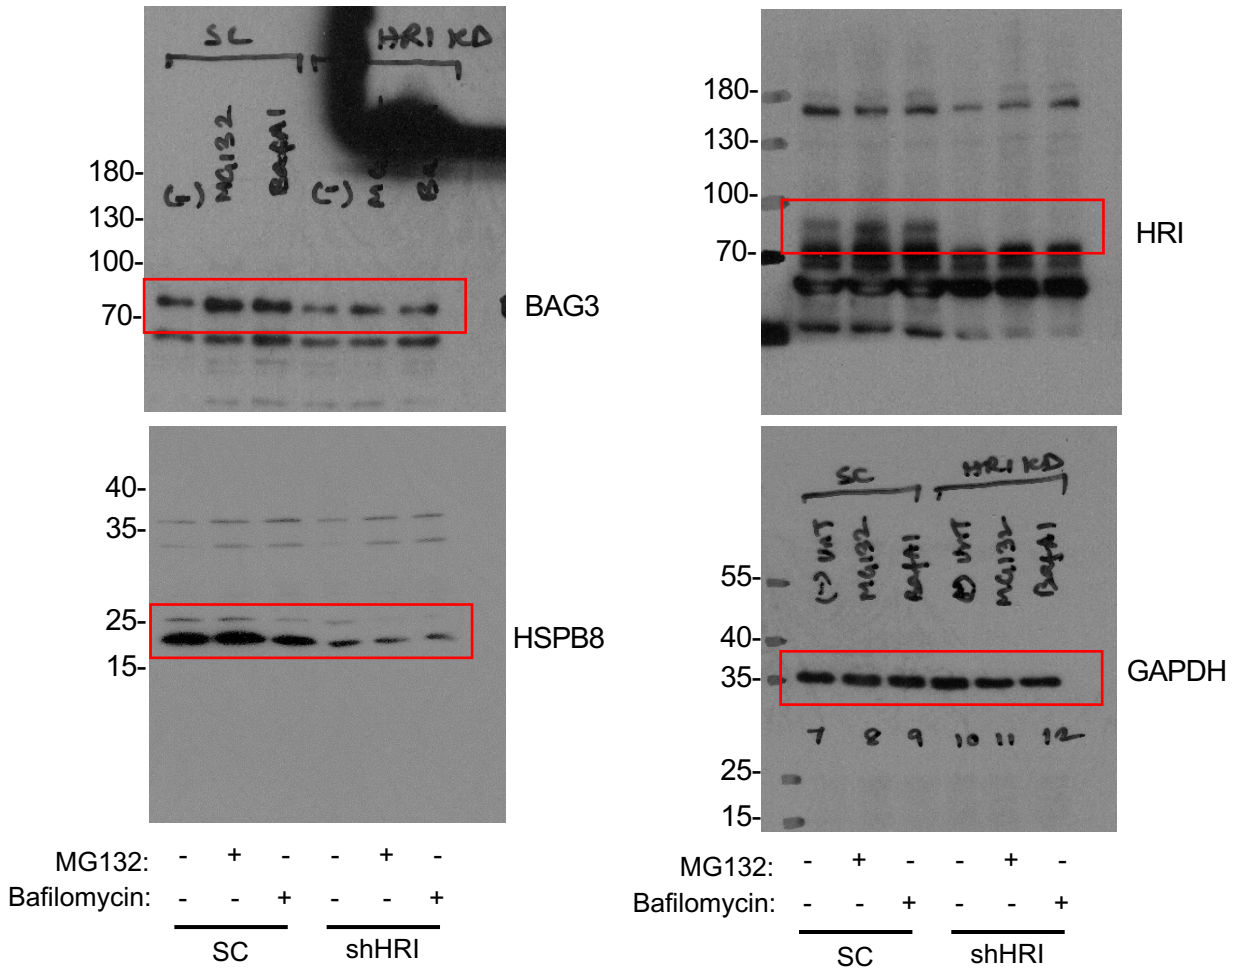

Source Data Figure 3

4B

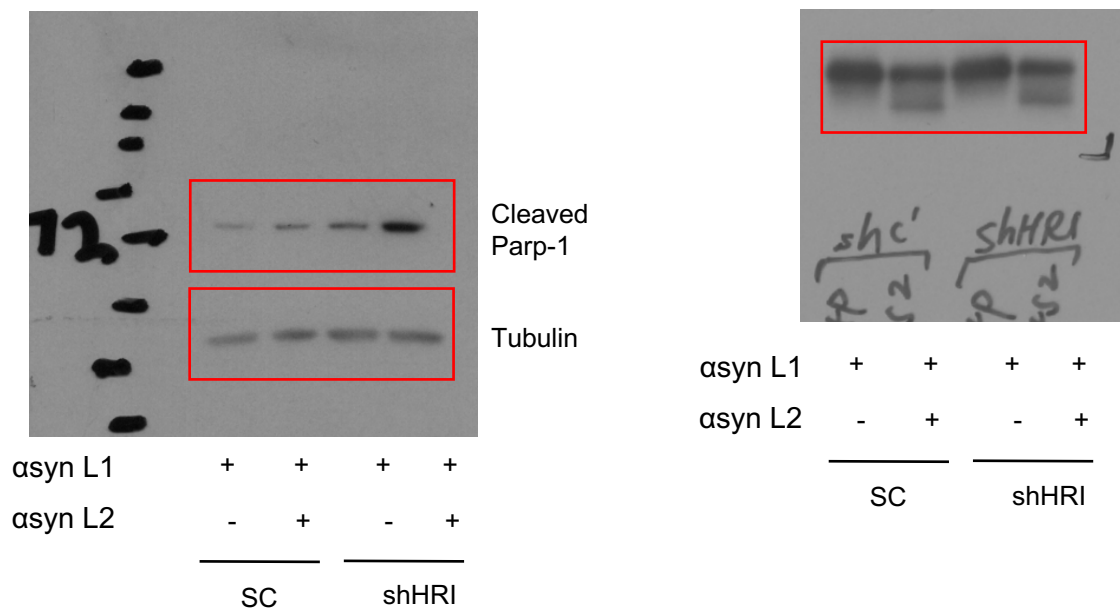

4C

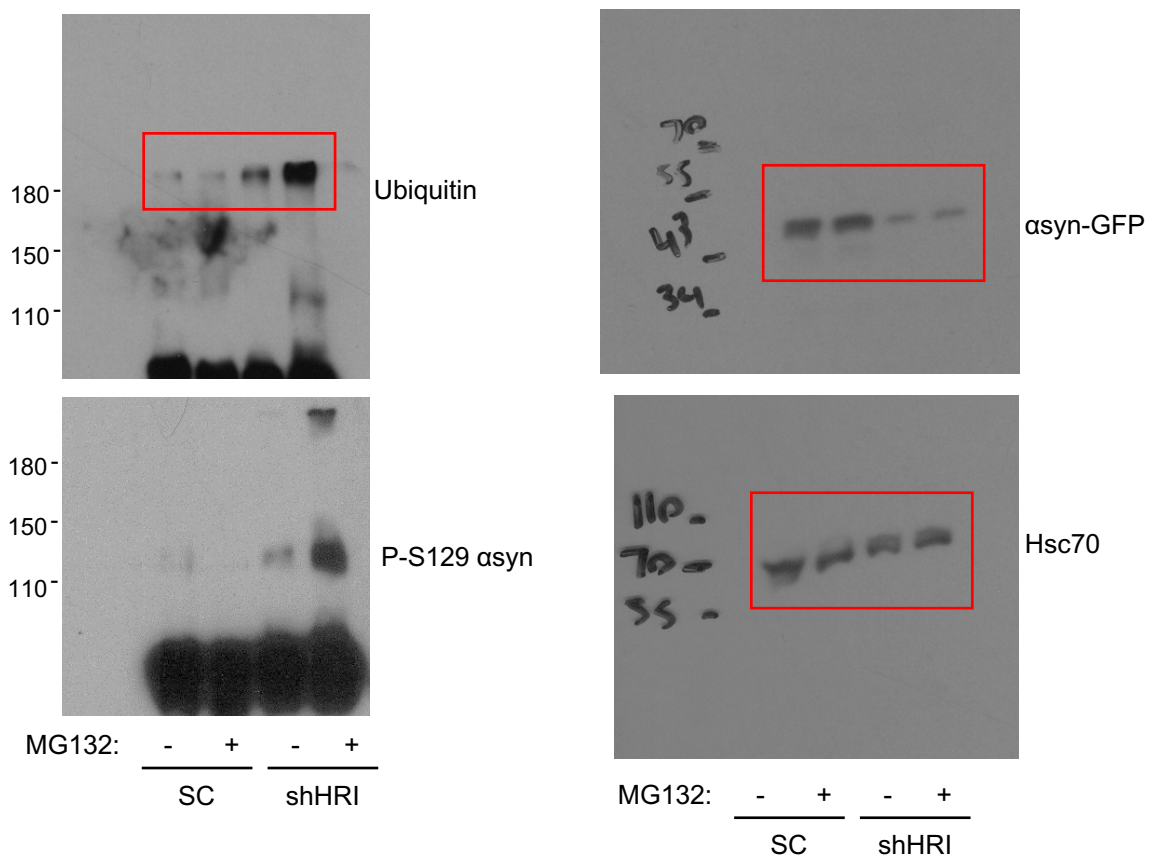

Source Data Figure 4

5G

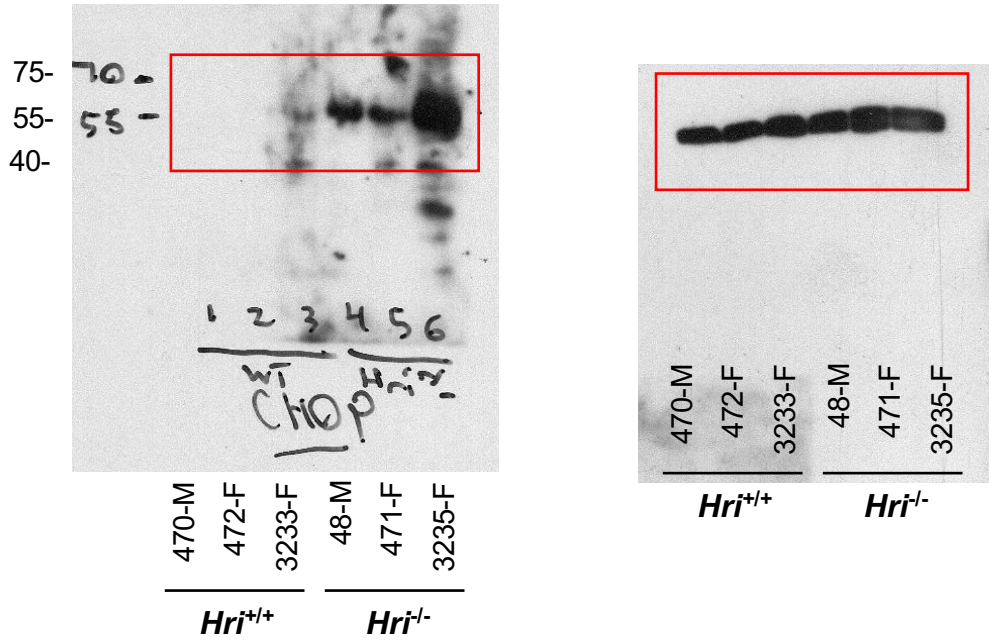

Source Data Figure 5

6A

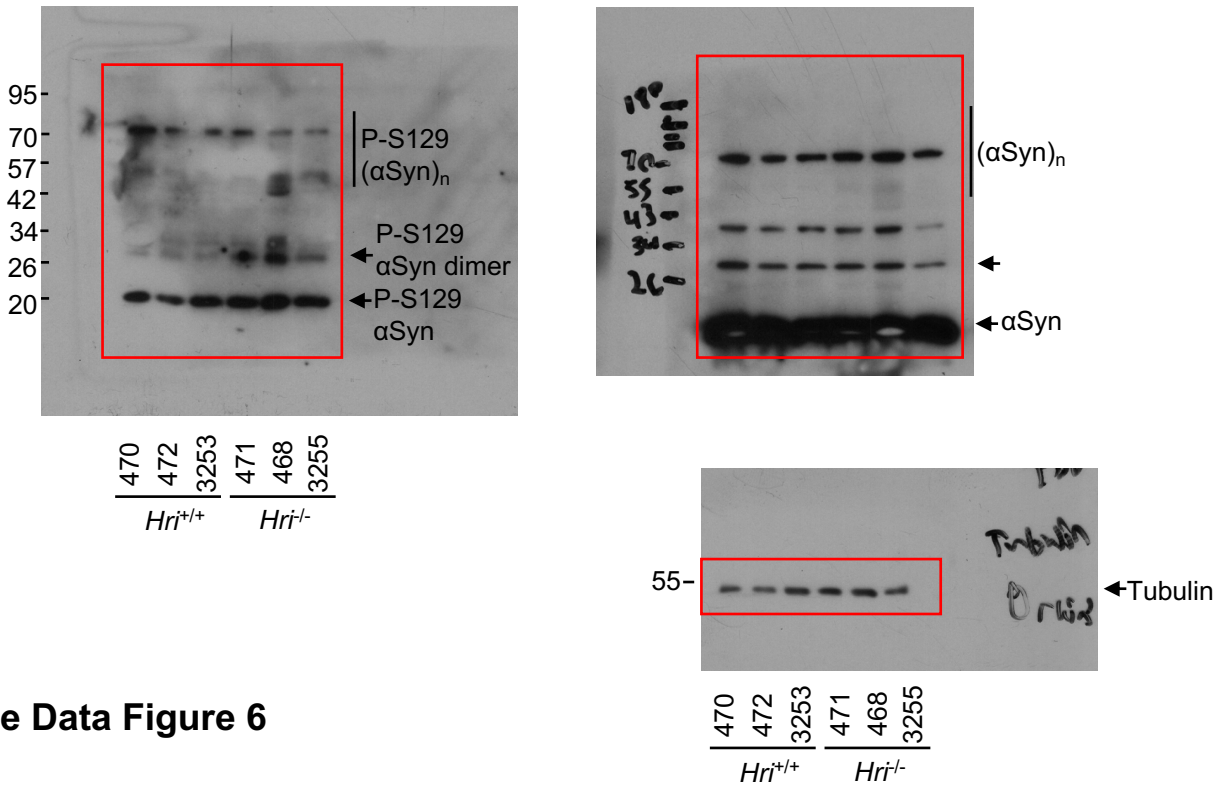

Source Data Figure 6
